# Supplementary material for: Probing photonic effect on photocatalytic degradation of dyes based on 3D inverse opal ZnO photonic crystal
Source: Royal Society of Chemistry journal article supplement (doi:10.1039/c3ra42618a), 2013-01-01
Supplement: c3ra42618a.pdf [file c3ra42618a.pdf]

## **Electronic Supplementary Information**

### **Probing photonic effect on photocatalytic degradation of dyes based on 3D inverse opal ZnO photonic crystal**

Sugang Meng, Danzhen Li\*, Peng Wang, Xiuzhen Zheng, Jinxiu Wang, Jing Chen,  
Jialin Fang, and Xianzhi Fu

Research Institute of Photocatalysis, State Key Laboratory Breeding Base of  
Photocatalysis, Fuzhou University, Fuzhou, 350002, P. R. China

Corresponding author Tel & Fax: (+86)591-83779256; E-mail: [dzli@fzu.edu.cn](mailto:dzli@fzu.edu.cn)

Table S1 the properties of probe molecules.

|                          | Position of absorption peak /nm | Color     | Molecular charge | Structural formula of the molecule                                                    |
|--------------------------|---------------------------------|-----------|------------------|---------------------------------------------------------------------------------------|
| Methyl orange<br>(MO)    | 464                             | orange    | anionic          | 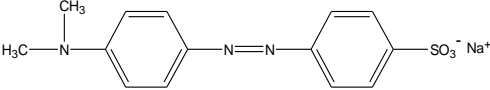    |
| Rhodamine B<br>(RhB)     | 554                             | pink      | cationic         |     |
| Methylene blue<br>(MB)   | 664                             | blue      | cationic         |    |
| 4-chlorophenol<br>(4-CP) | 224                             | colorless | anionic          |  |

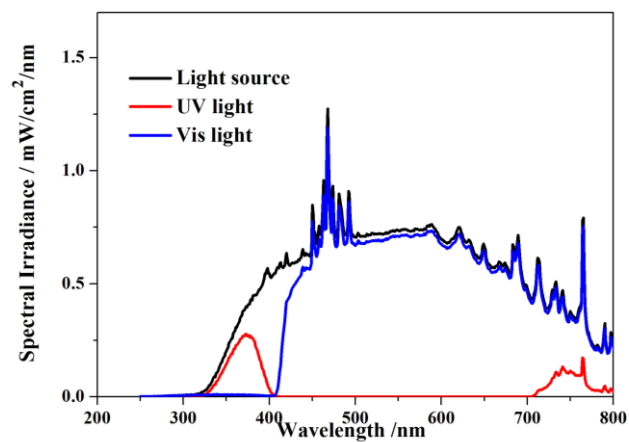

Fig. S1 The spectral intensities emitted by a light source equipped with different filters.

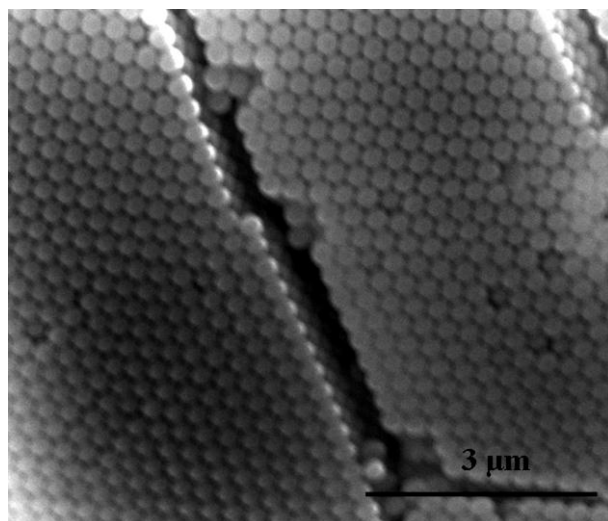

Fig. S2 SEM image of the PS opal template under cross-sectional view.

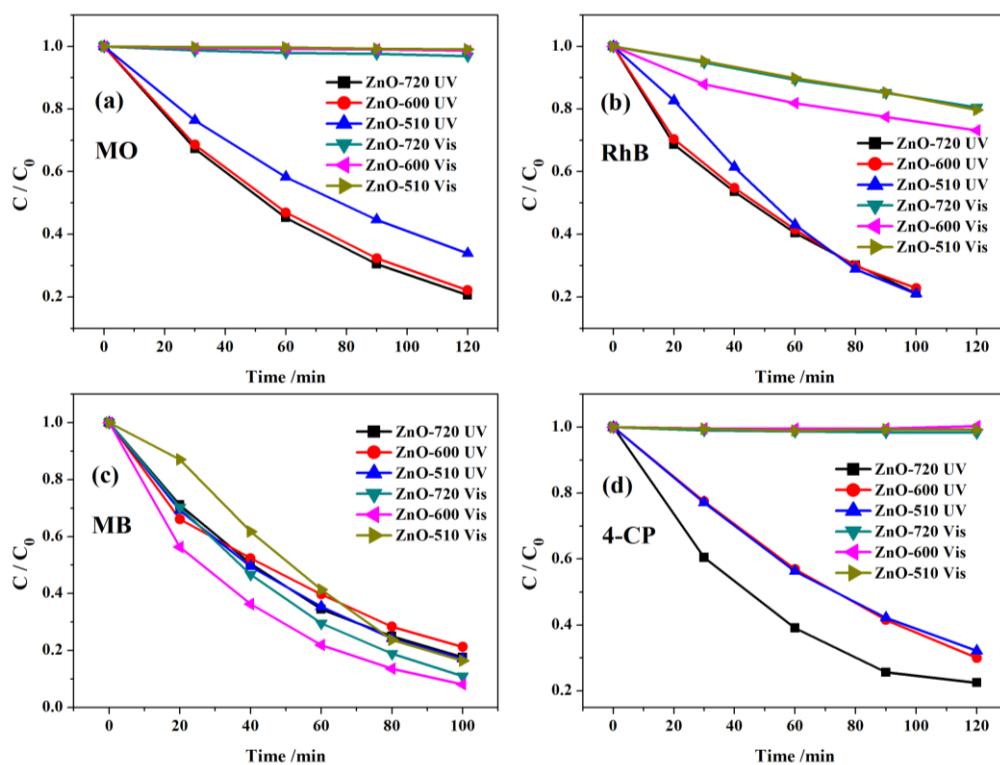

Fig. S3 Probe molecules degradation over the as-prepared ZnO-PCs under UV light and visible (Vis) light irradiation.

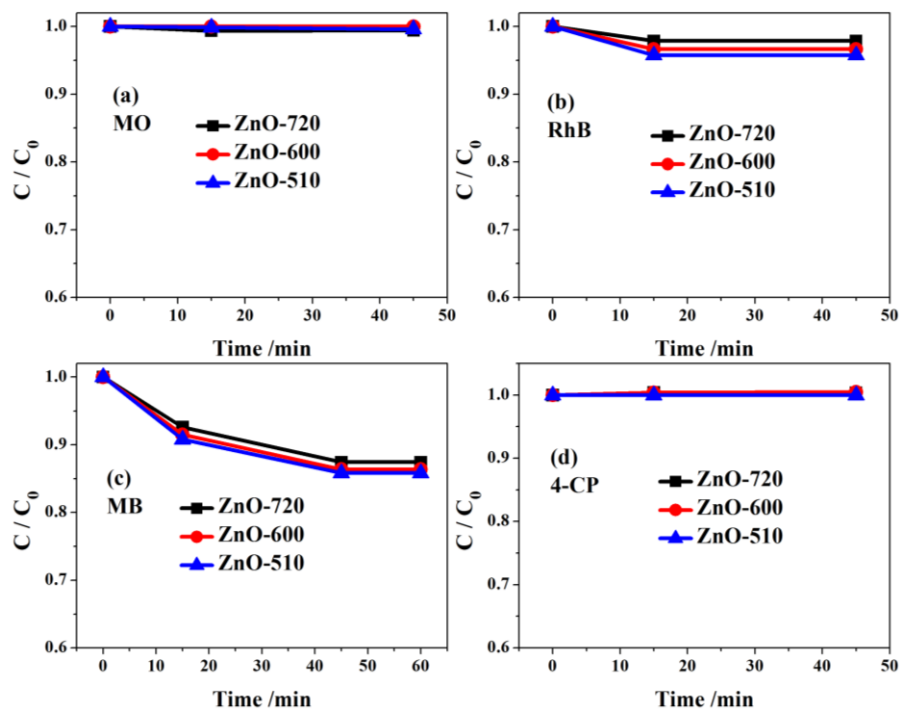

Fig. S4 Time profiles of adsorption of probe molecules over ZnO-PCs in the dark.

Table S2 Kinetic constants ( $k$ ) and regression coefficients ( $R^2$ ) of pollutants degradation under UV and visible (Vis) light irradiation.

|      |     | ZnO-510               |        | ZnO-590               |        | ZnO-700               |        |
|------|-----|-----------------------|--------|-----------------------|--------|-----------------------|--------|
|      |     | $k / \text{min}^{-1}$ | $R^2$  | $k / \text{min}^{-1}$ | $R^2$  | $k / \text{min}^{-1}$ | $R^2$  |
| MO   | UV  | 0.009                 | 1      | 0.01256               | 1      | 0.01319               | 1      |
|      | Vis | 8E-5                  | 0.9211 | 1E-4                  | 0.9235 | 5E-4                  | 0.9457 |
| RhB  | UV  | 0.01646               | 0.9815 | 0.01462               | 0.9979 | 0.01501               | 0.9961 |
|      | Vis | 0.0019                | 0.9996 | 0.00223               | 0.9694 | 0.00179               | 0.9987 |
| MB   | UV  | 0.01762               | 0.9996 | 0.01508               | 0.9943 | 0.01744               | 0.9997 |
|      | Vis | 0.01905               | 0.9687 | 0.02477               | 0.9990 | 0.02208               | 0.9945 |
| 4-CP | UV  | 0.0101                | 0.9974 | 0.00957               | 0.9990 | 0.01281               | 0.9579 |
|      | Vis | -                     |        | -                     |        | -                     |        |

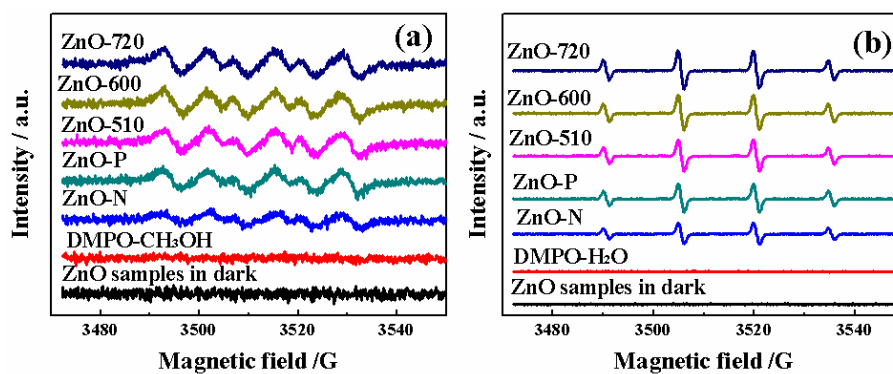

Fig. S5 ESR spectra of radical adducts trapped by DMPO in ZnO samples dispersions under UV light: (a)  $\text{DMPO}\cdot\text{O}_2^-$  formed in methanol dispersion; (b)  $\text{DMPO}\cdot\text{OH}$  formed in aqueous dispersions.

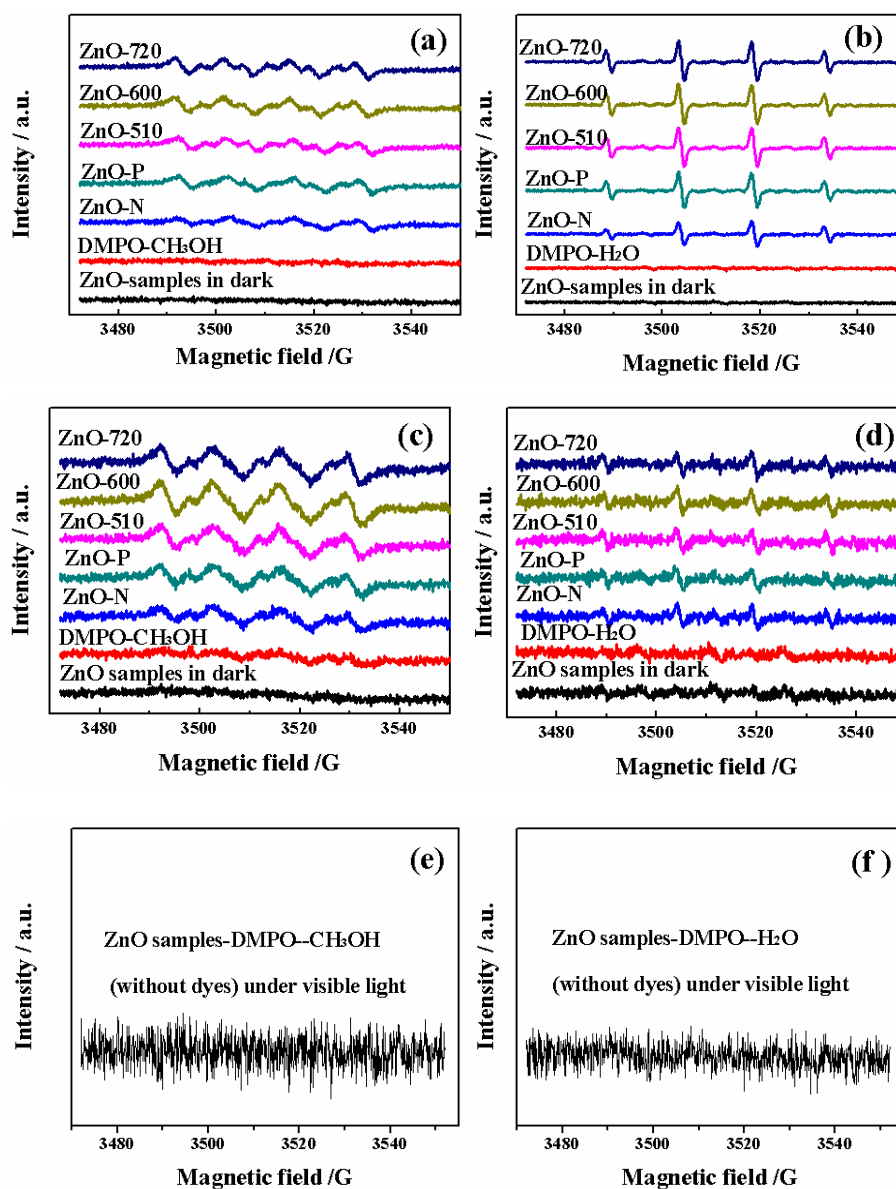

Fig. S6 ESR spectra of radical adducts trapped by DMPO in ZnO adsorbed dye dispersions under visible light irradiation: (a) DMPO-·O<sub>2</sub><sup>-</sup> formed in ZnO/RhB methanol dispersion; (b) DMPO-·OH formed in ZnO/RhB aqueous dispersions with pH 4. (c) DMPO-·O<sub>2</sub><sup>-</sup> formed in ZnO/MB methanol dispersion; (d) DMPO-·OH formed in ZnO/MB aqueous dispersions with pH 4. (e) DMPO-·O<sub>2</sub><sup>-</sup> formed in ZnO samples (no adsorbed dyes) methanol dispersion; (f) DMPO-·OH formed in ZnO samples (no adsorbed dyes) aqueous dispersions with pH 4.

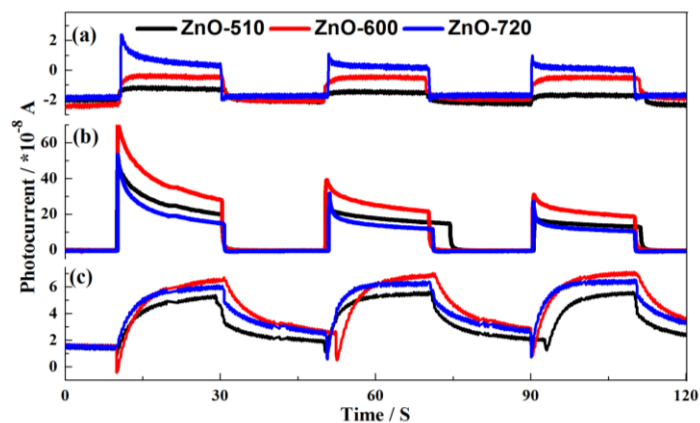

Fig. S7 Photocurrent responses of ZnO-PCs in (a) 0.1 M  $\text{Na}_2\text{SO}_4$ , (b) 0.1 M  $\text{Na}_2\text{SO}_4$  contained 2.4 ppm RhB, and (c) 0.1 M  $\text{Na}_2\text{SO}_4$  contained 2 ppm MB aqueous solutions under visible light irradiation, respectively.
